# Supplementary figures and images for: Assessment of murine colorectal cancer by micro-ultrasound using three dimensional reconstruction and non-linear contrast imaging
Source: PubMed Central journal article supplement — Mol Ther Methods Clin Dev. 2016 Nov 30;5:16070–. doi: 10.1038/mtm.2016.70 (PMC5147881; doi:10.1038/mtm.2016.70), 2016-11-30

# Mean Heart Rate

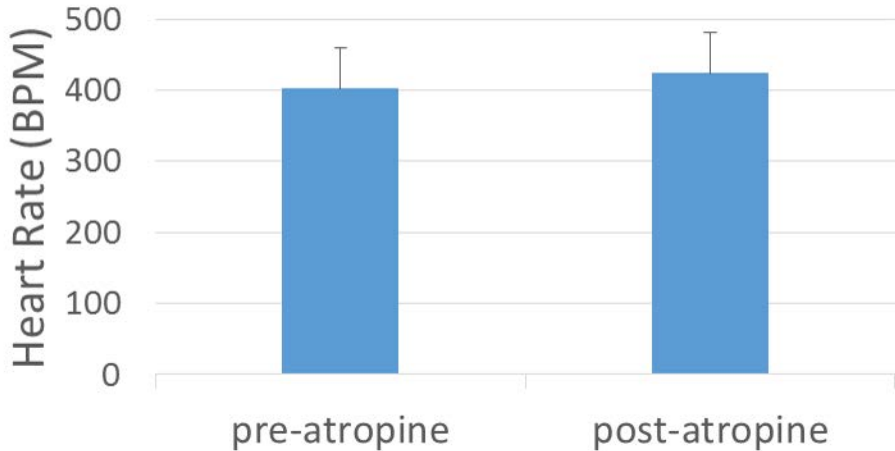

Supplement: mtm201670-s5.pdf [file mtm201670-s5.pdf]
